# Supplementary material for: Computer-Aided Detection (CAD) Software Versus Radiologists from Multiple Countries: A Comparison of Tuberculosis Detection from Chest X-Rays
Source: Research Square preprint supplement (doi:10.21203/rs.3.rs-5882564/v1), 2025-01-28
Supplement: Supplementary file 1 [file ae0e8279c37448b2513071eb.docx]

# ANNEXES

## Annex 1. Impact of radiologists’ characteristics and country on reading accuracy.

| **Random effects** | **Variance** | **Standard deviation** | **p-value** |
| --- | --- | --- | --- |
| Country | 0.019 | 0.138 |  |
| **Covariates** | **Estimate** | **Std. Error** |  |
| **Intercept** | **0.699** | **0.119** | **3.62e-09 ***** |
| TB X-rays read per year | 0.041 | 0.119 | 0.733 |
| Years of Experience | -0.189 | 0.137 | 0.170 |
| TB X-rays read per year * Years of Experience | -0.302 | 0.174 | 0.082. |
| **Coefficients** |  |  |  |
| Intercept | 0.569 | 0.401 | 0.156 |
| Years of Experience | -0.210 | 0.309 | 0.497 |
| TB X-rays read per year | 0.111 | 0.300 | 0.712 |
| Country: UK | 0.416 | 0.630 | 0.509 |
| Country: US | -0.018 | 0.625 | 0.977 |
| Country: India | 0.033 | 0.463 | 0.944 |
| TB X-rays read per year * Years of Experience | -0.343 | 0.375 | 0.361 |
| **Coefficients** |  |  |  |
| Intercept | 0.602 | 0.430 | 0.161 |
| Years of Experience | -0.381 | 0.335 | 0.256 |
| TB X-rays read per year | 0.417 | 0.314 | 0.185 |
| Country: UK | 0.963 | 0.671 | 0.151 |
| Country: US | 1.04 | 0.666 | 0.118 |
| Country: India | -0.552 | 0.498 | 0.268 |
| TB X-rays read per year * Years of Experience | -0.493 | 0.408 | 0.227 |

Significance. codes:  0 ‘***’ 0.001 ‘**’ 0.01 ‘*’ 0.05 ‘.’ 0.1 ‘ ’ 1; **bold** indicated significance at the 0.05 level.

## Annex 2. Comparing sensitivity and specificity between CAD and best-performing human radiologists.

Matching sensitivity to radiologists with the highest sensitivity (British), the specificity of Lunit INSIGHT CXR is significantly higher at 84.7% (95% CI: 81.3-87.7%) compared to 76.7% (95% CI: 72.9-80.3%) for the British radiologists (Table 1). While other CAD performed on par with British radiologists, those with significantly lower specificities included TiSepX-TB, XrayAME, and RADIFY at 69.1% (95% CI: 64.9-73.0%), 59.3% (95% CI: 54.9-63.8%), and 41.2% (95% CI: 36.9-45.6%), respectively. Similarly, when specificity is matched to that of the best-performing radiologists (American), Lunit INSIGHT CXR significantly improved upon American radiologists’ sensitivity, achieving sensitivity of 81.4% (95% CI: 74.0-87.5%) compared to the 68.6% (95% CI: 62.6-74.2%) of the radiologists. However, several CAD -InferRead, ChestEye, XrayAME, and RADIFY- performed significantly worse (Table 1).

*Table 1. Performance of CAD against radiology groups when matching sensitivity and specificity for restricted reading.*

| **CE Mark** | **Reader** | **Threshold score** | **Sensitivity (95% CI)** | **Specificity (95% CI)** |
| --- | --- | --- | --- | --- |
| **Matching sensitivity to best-performing radiologists’** | | | | |
|  | **UK radiologists** | ***N/A*** | ***78.7%, (73.2-83.5%)*** | ***76.7%, (72.9-80.3%)*** |
| Class IIb | qXR | 0.72 | 78.6% (70.8-85.1%) | 77.5% (73.7-81.1%) |
| CAD4TB | 0.38 | 78.6% (70.8-85.1%) | 77.1% (73.3-80.7%) |
| Chest Eye | 0.20 | 78.6% (70.8-85.1%) | 74.2% (70.2-77.9%) |
| Class IIa | **Lunit** | **0.75** | **78.6% (70.8-85.1%)** | **84.7% (81.3-87.7%)** |
| InferRead | 0.55 | 78.6% (70.8-85.1%) | 77.3% (73.5-80.9%) |
| Class I | Xvision | 0.21 | 78.7% (73.2-83.5%) | 79.5% (75.7-82.9%) |
| Not CE Marked | Nexus | 0.74 | 78.7% (73.2-83.5%) | 84.1% (80.7-87.2%) |
| JF CXR-2 | 0.82 | 78.6% (70.8-85.1%) | 76.7% (72.9-80.3%) |
| Genki | 0.36 | 78.6% (70.8-85.1%) | 75.8% (71.8-79.4%) |
| **TiSepX-TB** | **0.28** | **78.7% (73.2-83.5%)** | **69.1% (64.9-73%)** |
| **XRayAME** | **0.09** | **78.6% (70.8-85.1%)** | **59.3% (54.9-63.6%)** |
| **RADIFY** | **0.17** | **78.3% (72.8-83.2%)** | **41.2% (36.9-45.6%)** |
| **Matching specificity to best-performing radiologists’** | | | | |
|  | **US radiologists** | ***N/A*** | ***68.6%, (62.6-74.2%)*** | ***84.3%, (80.9-87.3%)*** |
| Class IIb | qXR | 0.85 | 72.9% (64.7-80%) | 84.3% (80.9-87.3%) |
| CAD4TB | 0.57 | 69.3% (60.9-76.8%) | 84.3% (80.9-87.3%) |
| **Chest Eye** | **0.42** | **58.6% (49.9-66.8%)** | **84.3% (80.9-87.3%)** |
| Class IIa | **Lunit** | **0.72** | **81.4% (74-87.5%)** | **84.3% (80.9-87.3%)** |
| **InferRead** | **0.71** | **61.4% (52.8-69.5%)** | **84.3% (80.9-87.3%)** |
| Class I | Xvision | 0.33 | 72.5% (66.6-77.8%) | 84.3% (80.9-87.3%) |
| Not CE Marked | Nexus | 0.75 | 77.9% (72.3-82.8%) | 84.3% (80.9-87.4%) |
| Genki | 0.55 | 67.1% (58.7-74.8%) | 84.3% (80.9-87.3%) |
| TiSepX-TB | 0.38 | 67.1% (61-72.8%) | 84.3% (80.9-87.4%) |
| JF CXR-2 | 0.93 | 64.3% (55.8-72.2%) | 84.3% (80.9-87.3%) |
| **XrayAME** | **0.48** | **52.1% (43.5-60.7%)** | **84.3% (80.9-87.3%)** |
| **RADIFY** | **0.72** | **31.4% (25.8-37.4%)** | **84.3% (80.9-87.4%)** |

*Significant differences are indicated in* ***bold.***

In the inclusive reading, when matching CAD’s sensitivity with that of radiologists with the highest sensitivity (American), Lunit INSIGHT CXR, qXR, JF CXR-2, ChestEye, and InferRead all significantly improved upon radiologists’ specificity of 47.3% (95% CI: 42.9-51.7%) (Table 8). While all other CAD achieved point estimates surpassing that of the radiologists’, RADIFY, TiSepX-TB, and XrayAME had significantly lower specificities of 34.4% (95% CI: 30.3-38.7%), 33.8% (95% CI: 29.8-38.1%), and 32.4% (95% CI: 28.3-36.6%), respectively. In the inclusive reading, Indian radiologists achieved the highest specificity at 73.64% (95% CI: 69.6-77.40%) with a corresponding sensitivity of 82.56% (77.37-86.98%). When matching this specificity, only Lunit INSIGHT CXR’s sensitivity was significantly higher, at 89.3% (95% CI: 82.9-93.9%). All other CAD performed on a similar level to Indian radiologists, except TiSepX-TB, XrayAME, and RADIFY, which were significantly less sensitive.

*Table 2. Performance of CAD against best performing radiology groups when matching sensitivity and specificity for inclusive reading.*

| **CE Mark** | **Reader** | **Threshold** | **Sensitivity** | **Specificity** |
| --- | --- | --- | --- | --- |
| **Matching sensitivity to best-performing radiologists’** | | | | |
|  | **US radiologists** | N/A | 92.3%, (88.3-95.2%) | 47.3%, (42.9-51.7%) |
| Class IIb | **qXR** | **0.279** | **92.1% (86.4-96%)** | **61.0% (56.7-65.3%)** |
| **Chest Eye** | **0.081** | **92.1% (86.4-96%)** | **55.4% (51-59.8%)** |
| CAD4TB | 0.034 | 92.1% (86.4-96%) | 51.2% (46.8-55.6%) |
| Class IIa | **Lunit** | **0.152** | **92.1% (86.4-96%)** | **68.4% (64.2-72.4%)** |
| **InferRead** | **0.285** | **92.1% (86.4-96%)** | **54.5% (50-58.8%)** |
| Class 1 | Xvision | 0.099 | 92.2% (88.3-95.2%) | 51.4% (46.9-55.7%) |
| Not CE Marked | **Nexus** | **0.384** | **92.2% (88.3-95.2%)** | **60.5% (56.2-64.8%)** |
| **JF CXR-2** | **0.312** | **92.1% (86.4-96%)** | **59.7% (55.3-64%)** |
| Genki | 0.027 | 92.1% (86.4-96%) | 52.7% (48.3-57.1%) |
| **RADIFY** | **0.06** | **82.6% (77.4-87%) *** | **34.4% (30.3-38.7%)** |
| **TiSepX-TB** | **0.144** | **92.2% (88.3-95.2%)** | **33.8% (29.8-38.1%)** |
| **XRayAME** | **0.019** | **92.1% (86.4-96%)** | **32.4% (28.3-36.6%)** |
| **Matching specificity to best-performing radiologists’** | | | | |
|  | **Indian radiologists** | *N/A* | 82.6%, (77.4-87.0%) | 73.6%, (69.6-77.4%) |
| Class IIb | CAD4TB | 0.283 | 80.0% (72.4-86.3%) | 73.4% (69.4-77.2%) |
| Qxr | 0.622 | 79.3% (71.6-85.7%) | 73.6% (69.6-77.4%) |
| Chest Eye | 0.191 | 79.3% (71.6-85.7%) | 73.6% (69.6-77.4%) |
| Class IIa | **Lunit** | **0.311** | **89.3% (82.9-93.9%)** | **73.6% (69.6-77.4%)** |
| InferRead | 0.472 | 85.0% (78-90.5%) | 73.6% (69.6-77.4%) |
| Class I | Xvision | 0.158 | 82.9% (77.8-87.3%) | 73.6% (69.6-77.4%) |
| Not CE Marked | Nexus | 0.59 | 86.0% (81.2-90%) | 73.5% (69.5-77.3%) |
| JF CXR-2 | 0.766 | 82.1% (74.8-88.1%) | 73.6% (69.6-77.4%) |
| Genki | 0.312 | 80.7% (73.2-86.9%) | 73.6% (69.6-77.4%) |
| **TiSepX-TB** | **0.305** | **76.7% (71.1-81.8%)** | **73.5% (69.5-77.3%)** |
| **XRayAME** | **0.242** | **71.4% (63.2-78.7%)** | **73.6% (69.6-77.4%)** |
| **RADIFY** | **0.581** | **43.0% (36.9-49.3%)** | **73.7% (69.7-77.4%)** |

*Significant differences are indicated in* ***bold.***

## Annex 3. Comparing sensitivity and specificity between CAD and human radiologists from different countries.

*Table 1: CAD threshold scores and specificity matching human readers sensitivity (restricted reading- Abnormalities suggestive of TB = “TB”, other abnormalities and normal = “Not TB”)*

| **Reader** | **Threshold** | **Sensitivity** | **Specificity** | **P value** |
| --- | --- | --- | --- | --- |
| **UK** | | | | |
| **UK radiologists** | **N/A** | **78.68%, (73.17-83.52%)** | **76.74%, (72.9-80.32%)** | **N/A** |
| **Lunit** | **0.745** | **78.6% (70.8-85.1%)** | **84.7% (81.3-87.7%)** | **0.0005** |
| Xvision | 0.209 | 78.7% (73.2-83.5%) | 79.5% (75.7-82.9%) | 0.28 |
| qXR | 0.723 | 78.6% (70.8-85.1%) | 77.5% (73.7-81.1%) | 0.79 |
| InferRead | 0.546 | 78.6% (70.8-85.1%) | 77.3% (73.5-80.9%) | 0.87 |
| CAD4TB | 0.375 | 78.6% (70.8-85.1%) | 77.1% (73.3-80.7%) | 0.92 |
| JF CXR-2 | 0.823 | 78.6% (70.8-85.1%) | 76.7% (72.9-80.3%) | 1 |
| Genki | 0.364 | 78.6% (70.8-85.1%) | 75.8% (71.8-79.4%) | 0.72 |
| Chest Eye | 0.204 | 78.6% (70.8-85.1%) | 74.2% (70.2-77.9%) | 0.36 |
| **TiSepX-TB** | **0.28** | **78.7% (73.2-83.5%)** | **69.1% (64.9-73%)** | **0.004** |
| **XRayAME** | **0.091** | **78.6% (70.8-85.1%)** | **59.3% (54.9-63.6%)** | **1.71 x 10-9** |
| **RADIFY** | **0.17** | **78.3% (72.8-83.2%)** | **41.2% (36.9-45.6%)** | **< 2.2 x 10-16** |
| **Nigeria** | | | | |
| **Nigerian radiologists** | **N/A** | **77.13%, (71.52-82.11%)** | **75.78%, (71.8-79.41%)** | **N/A** |
| **Lunit** | **0.757** | **77.1% (69.3-83.8%)** | **85.1% (81.7-88%)** | **4.66 x 10-5** |
| **Xvision** | **0.236** | **77.1% (71.5-82.1%)** | **80.4% (76.7-83.8%)** | **0.05** |
| CAD4TB | 0.403 | 77.1% (69.3-83.8%) | 78.5% (74.7-82%) | 0.29 |
| InferRead | 0.584 | 77.1% (69.3-83.8%) | 78.3% (74.5-81.8%) | 0.31 |
| qXR | 0.733 | 77.1% (69.3-83.8%) | 78.1% (74.3-81.6%) | 0.37 |
| JF CXR-2 | 0.853 | 77.1% (69.3-83.8%) | 77.5% (73.7-81.1%) | 0.49 |
| Genki | 0.378 | 77.1% (69.3-83.8%) | 76.2% (72.2-79.8%) | 0.92 |
| Chest Eye | 0.216 | 77.1% (69.3-83.8%) | 74.2% (70.2-77.9%) | 0.61 |
| TiSepX-TB | 0.304 | 77.1% (71.5-82.1%) | 72.9% (68.9-76.7%) | 0.29 |
| **XRayAME** | **0.099** | **77.1% (69.3-83.8%)** | **61.6% (57.3-65.8%)** | **9.38 x 10-7** |
| **RADIFY** | **0.19** | **77.1% (71.5-82.1%)** | **41.8% (37.5-46.2%)** | **< 2.2 x 10-16** |
| **India** | | | | |
| **Indian Radiologists** | **N/A** | **67.05%, (60.95-72.76%)** | **83.33%, (79.8-86.45%)** | **N/A** |
| **Xvision** | **0.398** | **67.1% (61-72.8%)** | **89.5% (86.6-92%)** | **0.001** |
| **Lunit** | **0.859** | **67.1% (58.7-74.8%)** | **89.1% (86.1-91.7%)** | **0.003** |
| **CAD4TB** | **0.628** | **67.1% (58.7-74.8%)** | **87.2% (84-90%)** | **0.05** |
| qXR | 0.878 | 67.1% (58.7-74.8%) | 86.2% (83-89.1%) | 0.17 |
| TiSepX-TB | 0.379 | 67.1% (61-72.8%) | 84.3% (80.9-87.4%) | 0.66 |
| Genki | 0.555 | 67.1% (58.7-74.8%) | 84.3% (80.9-87.3%) | 0.66 |
| JF CXR-2 | 0.921 | 67.1% (58.7-74.8%) | 83.9% (80.5-87%) | 0.8 |
| InferRead | 0.682 | 67.1% (58.7-74.8%) | 82.6% (79-85.7%) | 0.76 |
| Chest Eye | 0.342 | 67.1% (58.7-74.8%) | 81.0% (77.4-84.3%) | 0.31 |
| **XRayAME** | **0.308** | **67.1% (58.7-74.8%)** | **76.9% (73.1-80.5%)** | **0.005** |
| **RADIFY** | **0.44** | **67.4% (61.4-73.1%)** | **50.9% (46.5-55.3%)** | **< 2.2 x 10-16** |
| **US** | | | | |
| **American Radiologists** | **N/A** | **68.60%, (62.56-74.22%)** | **84.30%, (80.9-87.33%)** | **N/A** |
| **Xvision** | **0.383** | **68.6% (62.6-74.2%)** | **88.6% (85.5-91.2%)** | **0.03** |
| **Lunit** | **0.845** | **68.6% (60.2-76.1%)** | **88.4% (85.3-91%)** | **0.04** |
| qXR | 0.873 | 68.6% (60.2-76.1%) | 85.5% (82.1-88.4%) | 0.65 |
| CAD4TB | 0.57 | 68.6% (60.2-76.1%) | 84.3% (80.9-87.3%) | 1 |
| JF CXR-2 | 0.911 | 68.6% (60.2-76.1%) | 82.9% (79.4-86.1%) | 0.53 |
| Genki | 0.504 | 68.6% (60.2-76.1%) | 82.0% (78.4-85.2%) | 0.27 |
| InferRead | 0.656 | 68.6% (60.2-76.1%) | 81.4% (77.8-84.7%) | 0.18 |
| TiSepX-TB | 0.353 | 68.2% (62.2-73.9%) | 81.0% (77.4-84.3%) | 0.13 |
| **Chest Eye** | **0.317** | **68.6% (60.2-76.1%)** | **79.5% (75.7-82.9%)** | **0.03** |
| **XRayAME** | **0.304** | **68.6% (60.2-76.1%)** | **76.7% (72.9-80.3%)** | **0.0008** |
| **RADIFY** | **0.43** | **69.8% (63.8-75.3%) *** | **49.9% (45.5-54.3%)** | **< 2.2 x 10-16** |
|  |  | *Closest to 68.60 |  |  |

In the inclusive reading, X-rays with any abnormality (suggestive of TB or not suggestive of TB) were considered TB positive, while normal X-rays were categorised as TB negative.

Table 2:  *CAD threshold scores and specificity matching human readers sensitivity (inclusive reading)*

| **Readers** | **Threshold** | **Sensitivity** | **Specificity** | **P value** |
| --- | --- | --- | --- | --- |
| **UK** | | | | |
| **UK radiologists** | **N/A** | **87.21%, (82.51-91.03%)** | **63.37%, (59.1-67.54%)** | **N/A** |
| **Lunit** | **0.511** | **87.1% (80.4-92.2%)** | **79.5% (75.7-82.9%)** | **3.83 x 10-9** |
| **InferRead** | **0.442** | **87.1% (80.4-92.2%)** | **71.5% (67.4-75.4%)** | **0.005** |
| JF CXR-2 | 0.649 | 87.1% (80.4-92.2%) | 68.8% (64.6-72.8%) | 0.07 |
| qXR | 0.41 | 87.1% (80.4-92.2%) | 67.8% (63.6-71.8%) | 0.14 |
| Chest Eye | 0.132 | 87.1% (80.4-92.2%) | 67.6% (63.4-71.7%) | 0.15 |
| Xvision | 0.129 | 87.2% (82.5-91%) | 66.7% (62.4-70.7%) | 0.28 |
| Genki | 0.074 | 87.1% (80.4-92.2%) | 61.4% (57.1-65.7%) | 0.59 |
| CAD4TB | 0.091 | 87.1% (80.4-92.2%) | 60.5% (56.1-64.7%) | 0.39 |
| **TiSepX-TB** | **0.205** | **87.2% (82.5-91%)** | **53.6% (49.2-57.9%)** | **0.004** |
| **XRayAME** | **0.035** | **87.1% (80.4-92.2%)** | **43.6% (39.3-48%)** | **1.51 x 10-8** |
| **RADIFY** | **0.06** | **82.6% (77.4-87%) *** | **34.4% (30.3-38.7%)** | **2.3 x 10-15** |
|  |  | *Closest sensitivity to 87.21 | |  |
| **Nigeria** | | | | |
| **Nigerian radiologists** | **N/A** | **86.82%, (82.07-90.70%)** | **61.05%, (56.7-65.28%)** | **N/A** |
| **Lunit** | **0.555** | **86.4% (79.6-91.6%)** | **79.7% (75.9-83%)** | **2.36 x 10-11** |
| **InferRead** | **0.443** | **86.4% (79.6-91.6%)** | **71.7% (67.6-75.6%)** | **0.0004** |
| **JF CXR-2** | **0.664** | **86.4% (79.6-91.6%)** | **69.4% (65.2-73.3%)** | **0.007** |
| **qXR** | **0.434** | **86.4% (79.6-91.6%)** | **68.2% (64-72.2%)** | **0.02** |
| **Xvision** | **0.135** | **86.8% (82.1-90.7%)** | **67.8% (63.6-71.8%)** | **0.03** |
| **Chest Eye** | **0.133** | **86.4% (79.6-91.6%)** | **67.8% (63.6-71.8%)** | **0.03** |
| Genki | 0.075 | 86.4% (79.6-91.6%) | 61.4% (57.1-65.7%) | 0.93 |
| CAD4TB | 0.096 | 86.4% (79.6-91.6%) | 60.7% (56.3-64.9%) | 0.94 |
| **TiSepX-TB** | **0.21** | **86.4% (81.6-90.4%)** | **54.9% (50.5-59.3%)** | **0.07** |
| **XRayAME** | **0.042** | **86.4% (79.6-91.6%)** | **44.4% (40-48.8%)** | **2.2 x 10-6** |
| **RADIFY** | **0.06** | **82.6% (77.4-87%) *** | **34.4% (30.3-38.7%)** | **4.4 x 10-13** |
|  |  | *Note - closest sensitivity to 86.82 | |  |
| **India** | | | | |
| **Indian radiologists** | **N/A** | **82.56%, (77.37-86.98%)** | **73.64%, (69.6-77.40%)** | **N/A** |
| **Lunit** | **0.694** | **82.9% (75.6-88.7%)** | **83.5% (80-86.6%)** | **2.95 x 10-5** |
| Xvision | 0.165 | 82.6% (77.4-87%) | 75.2% (71.2-78.9%) | 0.58 |
| InferRead | 0.489 | 82.9% (75.6-88.7%) | 74.4% (70.4-78.1%) | 0.8 |
| JF CXR-2 | 0.771 | 82.1% (74.8-88.1%) | 73.8% (69.8-77.6%) | 0.96 |
| Chest Eye | 0.164 | 82.9% (75.6-88.7%) | 71.5% (67.4-75.4%) | 0.46 |
| qXR | 0.526 | 82.9% (75.6-88.7%) | 70.9% (66.8-74.8%) | 0.33 |
| Genki | 0.181 | 82.9% (75.6-88.7%) | 68.4% (64.2-72.4%) | 0.06 |
| **CAD4TB** | **0.144** | **82.9% (75.6-88.7%)** | **65.5% (61.2-69.6%)** | **0.004** |
| **TiSepX-TB** | **0.234** | **82.6% (77.4-87%)** | **60.0% (55.6-64.2%)** | **3.63 x 10-6** |
| **XRayAME** | **0.061** | **82.9% (75.6-88.7%)** | **52.5% (48.1-56.9%)** | **1.21 x 10-11** |
| **RADIFY** | **0.06** | **82.6% (77.4-87%)** | **34.4% (30.3-38.7%)** | **< 2.2 x10-16** |
| **US** | | | | |
| **American radiologists** | N/A | 92.25%, (88.28-95.20%) | 47.29%, (42.9-51.70%) | N/A |
| **Lunit** | **0.152** | **92.1% (86.4-96%)** | **68.4% (64.2-72.4%)** | **1.73 x 10-10** |
| **qXR** | **0.279** | **92.1% (86.4-96%)** | **61.0% (56.7-65.3%)** | **6.87 x 10-5** |
| **JF CXR-2** | **0.312** | **92.1% (86.4-96%)** | **59.7% (55.3-64%)** | **0.0004** |
| **Chest Eye** | **0.081** | **92.1% (86.4-96%)** | **55.4% (51-59.8%)** | **0.02** |
| **InferRead** | **0.285** | **92.1% (86.4-96%)** | **54.5% (50-58.8%)** | **0.05** |
| Genki | 0.027 | 92.1% (86.4-96%) | 52.7% (48.3-57.1%) | 0.14 |
| Xvision | 0.099 | 92.2% (88.3-95.2%) | 51.4% (46.9-55.7%) | 0.27 |
| CAD4TB | 0.034 | 92.1% (86.4-96%) | 51.2% (46.8-55.6%) | 0.3 |
| **RADIFY** | **0.06** | **82.6% (77.4-87%) *** | **34.4% (30.3-38.7%)** | **0.001** |
| **TiSepX-TB** | **0.144** | **92.2% (88.3-95.2%)** | **33.8% (29.8-38.1%)** | **0.0007** |
| **XRayAME** | **0.019** | **92.1% (86.4-96%)** | **32.4% (28.3-36.6%)** | **0.0002** |
|  |  | *Note - closest sensitivity to 92.25 | |  |

**Matching specificities, difference in sensitivity**

*Table 3: CAD threshold scores and sensitivity matching human readers specificity (restricted reading)*

| **Reader** | **Threshold** | **Sensitivity** | **Specificity** | **P Value** |
| --- | --- | --- | --- | --- |
| **UK** | | | | |
| **UK radiologists** | **N/A** | **78.68% (73.17-83.52%)** | **76.74% (72.9-80.32%)** | **N/A** |
| **Lunit** | **0.43** | **87.1% (80.4-92.2%)** | **76.7% (72.9-80.3%)** | **8.44 x 10-5** |
| InferRead | 0.52 | 81.4% (74-87.5%) | 76.7% (72.9-80.3%) | 0.26 |
| Xvision | 0.178 | 81.0% (75.7-85.6%) | 76.7% (72.9-80.3%) | 0.34 |
| Qxr | 0.71 | 78.6% (70.8-85.1%) | 76.7% (72.9-80.3%) | 1 |
| CAD4TB | 0.37 | 78.6% (70.8-85.1%) | 76.7% (72.9-80.3%) | 1 |
| JF CXR-2 | 0.822 | 78.6% (70.8-85.1%) | 76.7% (72.9-80.3%) | 1 |
| Genki | 0.387 | 76.4% (68.5-83.2%) | 76.7% (72.9-80.3%) | 0.39 |
| Chest Eye | 0.244 | 75.0% (67-81.9%) | 76.6% (72.7-80.1%) | 0.14 |
| **TiSepX-TB** | **0.327** | **73.3% (67.4-78.6%)** | **76.6% (72.7-80.2%)** | **0.03** |
| **XRayAME** | **0.295** | **68.6% (60.2-76.1%)** | **76.7% (72.9-80.3%)** | **0.0001** |
| **RADIFY** | **0.591** | **39.5% (33.5-45.8%)** | **77.0% (73.1-80.5%)** | **< 2.2 x 10-16** |
| **Nigeria** | | | | |
| **Nigerian radiologists** | **N/A** | **77.13%, (71.52-82.11%)** | **75.78%, (71.8-79.41%)** | **N/A** |
| **Lunit** | **0.411** | **88.6% (82.1-93.3%)** | **75.8% (71.8-79.4%)** | **6.45 x 10-8** |
| **Xvision** | **0.174** | **81.8% (76.5-86.3%)** | **75.8% (71.8-79.4%)** | **0.05** |
| InferRead | 0.503 | 81.4% (74-87.5%) | 75.8% (71.8-79.4%) | 0.07 |
| JF CXR-2 | 0.798 | 81.4% (74-87.5%) | 75.8% (71.8-79.4%) | 0.07 |
| Genki | 0.355 | 79.3% (71.6-85.7%) | 75.8% (71.8-79.4%) | 0.38 |
| qXR | 0.696 | 78.6% (70.8-85.1%) | 75.8% (71.8-79.4%) | 0.59 |
| CAD4TB | 0.351 | 78.6% (70.8-85.1%) | 75.8% (71.8-79.4%) | 0.59 |
| Chest Eye | 0.234 | 75.7% (67.8-82.6%) | 76.0% (72-79.6%) | 0.6 |
| TiSepX-TB | 0.322 | 74.8% (69-80%) | 75.8% (71.9-79.5%) | 0.38 |
| **XRayAME** | **0.284** | **68.6% (60.2-76.1%)** | **75.8% (71.8-79.4%)** | **0.002** |
| **RADIFY** | **0.591** | **39.5% (33.5-45.8%)** | **77.0% (73.1-80.5%)** | **< 2.2 x 10-16** |
| **US** | | | | |
| **American radiologists** | **N/A** | **68.60%, (62.56-74.22%)** | **84.30%, (80.9-87.33%)** | **N/A** |
| **Lunit** | **0.721** | **81.4% (74-87.5%)** | **84.3% (80.9-87.3%)** | **6.31 x 10-7** |
| qXR | 0.847 | 72.9% (64.7-80%) | 84.3% (80.9-87.3%) | 0.13 |
| Xvision | 0.327 | 72.5% (66.6-77.8%) | 84.3% (80.9-87.3%) | 0.17 |
| CAD4TB | 0.565 | 69.3% (60.9-76.8%) | 84.3% (80.9-87.3%) | 0.86 |
| Genki | 0.547 | 67.1% (58.7-74.8%) | 84.3% (80.9-87.3%) | 0.65 |
| TiSepX-TB | 0.378 | 67.1% (61-72.8%) | 84.3% (80.9-87.4%) | 0.62 |
| JF CXR-2 | 0.926 | 64.3% (55.8-72.2%) | 84.3% (80.9-87.3%) | 0.16 |
| **InferRead** | **0.709** | **61.4% (52.8-69.5%)** | **84.3% (80.9-87.3%)** | **0.02** |
| **Chest Eye** | **0.419** | **58.6% (49.9-66.8%)** | **84.3% (80.9-87.3%)** | **0.001** |
| **XRayAME** | **0.482** | **52.1% (43.5-60.7%)** | **84.3% (80.9-87.3%)** | **3.6 x 10-7** |
| **RADIFY** | **0.721** | **31.4% (25.8-37.4%)** | **84.3% (80.9-87.4%)** | **< 2.2 x 10-16** |
| **India** | | | | |
| **Indian radiologists** | **N/A** | **67.05%, (60.95-72.76%)** | **83.33%, (79.8-86.45%)** | **N/A** |
| **Lunit** | **0.676** | **82.9% (75.6-88.7%)** | **83.3% (79.8-86.4%)** | **8.11 x 10-10** |
| **qXR** | **0.842** | **75.0% (67-81.9%)** | **83.5% (80-86.6%)** | **0.005** |
| **Xvision** | **0.293** | **74.0% (68.2-79.3%)** | **83.3% (79.8-86.4%)** | **0.01** |
| CAD4TB | 0.53 | 70.0% (61.7-77.4%) | 83.3% (79.8-86.4%) | 0.32 |
| TiSepX-TB | 0.367 | 68.2% (62.2-73.9%) | 83.2% (79.7-86.3%) | 0.72 |
| Genki | 0.529 | 67.9% (59.4-75.5%) | 83.3% (79.8-86.4%) | 0.82 |
| JF CXR-2 | 0.918 | 67.1% (58.7-74.8%) | 83.5% (80-86.6%) | 1 |
| InferRead | 0.688 | 65.7% (57.2-73.5%) | 83.3% (79.8-86.4%) | 0.69 |
| Chest Eye | 0.377 | 62.9% (54.3-70.9%) | 83.5% (80-86.6%) | 0.18 |
| **XRayAME** | **0.451** | **55.0% (46.4-63.4%)** | **83.3% (79.8-86.4%)** | **0.0002** |
| **RADIFY** | **0.601** | **31.8% (26.1-37.8%)** | **83.6% (80.1-86.7%)** | **< 2.2 x 10-16** |

*Table 4: CAD threshold scores and sensitivity matching human readers specificity (inclusive reading)*

| **Reader** | **Threshold** | **Sensitivity** | **Specificity** | **P Value** |
| --- | --- | --- | --- | --- |
| **UK** | | | | |
| **UK radiologists** | **N/A** | **87.21%, (82.51-91.03%)** | **63.37%, (59.1-67.54%)** | **N/A** |
| **Lunit** | **0.094** | **92.1% (86.4-96%)** | **63.4% (59.1-67.5%)** | **0.003** |
| qXR | 0.312 | 89.3% (82.9-93.9%) | 63.2% (58.9-67.4%) | 0.27 |
| InferRead | 0.368 | 89.3% (82.9-93.9%) | 63.2% (58.9-67.4%) | 0.27 |
| Chest Eye | 0.111 | 89.3% (82.9-93.9%) | 63.4% (59.1-67.5%) | 0.27 |
| JF CXR-2 | 0.405 | 88.6% (82.1-93.3%) | 63.4% (59.1-67.5%) | 0.46 |
| Xvision | 0.119 | 88.4% (83.8-92%) | 63.2% (58.9-67.4%) | 0.56 |
| Genki | 0.084 | 85.7% (78.8-91.1%) | 63.2% (58.9-67.4%) | 0.45 |
| CAD4TB | 0.118 | 84.3% (77.2-89.9%) | 63.2% (58.9-67.4%) | 0.14 |
| **TiSepX-TB** | **0.251** | **81.4% (76.1-86%)** | **63.2% (58.9-67.4%)** | **0.005** |
| **XRayAME** | **0.117** | **75.7% (67.8-82.6%)** | **63.4% (59.1-67.5%)** | **2.05 x 10-7** |
| **RADIFY** | **0.521** | **51.2% (44.9-57.4%)** | **63.8% (59.5-68%)** | **< 2.2 x 10-16** |
| **Nigeria** | | | | |
| **Nigerian radiologists** | **N/A** | **86.82%, (82.07-90.70%)** | **61.05%, (56.7-65.28%)** | **N/A** |
| **Lunit** | **0.065** | **93.6% (88.1-97%)** | **61.0% (56.7-65.3%)** | **3.52 x 10-5** |
| **qXR** | **0.272** | **92.1% (86.4-96%)** | **61.0% (56.7-65.3%)** | **0.002** |
| **JF CXR-2** | **0.344** | **90.7% (84.6-95%)** | **61.0% (56.7-65.3%)** | **0.03** |
| **Chest Eye** | **0.099** | **90.7% (84.6-95%)** | **61.2% (56.9-65.5%)** | **0.03** |
| InferRead | 0.331 | 90.0% (83.8-94.4%) | 61.0% (56.7-65.3%) | 0.07 |
| Xvision | 0.115 | 89.1% (84.7-92.7%) | 60.9% (56.5-65.1%) | 0.21 |
| Genki | 0.072 | 87.1% (80.4-92.2%) | 61.2% (56.9-65.5%) | 0.94 |
| CAD4TB | 0.102 | 85.0% (78-90.5%) | 61.0% (56.7-65.3%) | 0.38 |
| **TiSepX-TB** | **0.24** | **82.2% (76.9-86.6%)** | **61.3% (57-65.5%)** | **0.02** |
| **XRayAME** | **0.098** | **77.1% (69.3-83.8%)** | **61.2% (56.9-65.5%)** | **9.41 x 10-6** |
| **RADIFY** | **0.501** | **55.8% (49.5-62%)** | **61.5% (57.2-65.7%)** | **< 2.2 x 10-16** |
| **US** | | | | |
| **American radiologists** | **N/A** | **92.25%, (88.28-95.20%)** | **47.29%, (42.9-51.70%)** | **N/A** |
| **Lunit** | **0.021** | **96.4% (91.9-98.8%)** | **47.3% (42.9-51.7%)** | **0.001** |
| **JF CXR-2** | **0.088** | **96.4% (91.9-98.8%)** | **47.3% (42.9-51.7%)** | **0.001** |
| **qXR** | **0.099** | **95.7% (90.9-98.4%)** | **47.3% (42.9-51.7%)** | **0.007** |
| **Chest Eye** | **0.067** | **95.0% (90-98%)** | **47.5% (43.1-51.9%)** | **0.04** |
| **Genki** | **0.015** | **95.0% (90-98%)** | **46.9% (42.5-51.3%)** | **0.04** |
| Xvision | 0.093 | 93.4% (89.7-96.1%) | 47.9% (43.5-52.3%) | 0.45 |
| CAD4TB | 0.025 | 92.9% (87.3-96.5%) | 47.1% (42.7-51.5%) | 0.71 |
| InferRead | 0.246 | 92.9% (87.3-96.5%) | 47.5% (43.1-51.9%) | 0.71 |
| TiSepX-TB | 0.176 | 90.3% (86-93.6%) | 47.4% (43-51.8%) | 0.23 |
| **XRayAME** | **0.047** | **85.0% (78-90.5%)** | **47.3% (42.9-51.7%)** | **3.39 x 10-5** |
| **RADIFY** | **0.371** | **72.9% (67-78.2%)** | **47.4% (43-51.8%)** | **< 2.2 x 10-16** |
| **India** | | | | |
| **Indian radiologists** | **N/A** | **82.56%, (77.37-86.98%)** | **73.64%, (69.6-77.40%)** | **N/A** |
| **Lunit** | **0.311** | **89.3% (82.9-93.9%)** | **73.6% (69.6-77.4%)** | **0.0006** |
| InferRead | 0.472 | 85.0% (78-90.5%) | 73.6% (69.6-77.4%) | 0.26 |
| Xvision | 0.158 | 82.9% (77.8-87.3%) | 73.6% (69.6-77.4%) | 0.9 |
| JF CXR-2 | 0.766 | 82.1% (74.8-88.1%) | 73.6% (69.6-77.4%) | 0.9 |
| Genki | 0.312 | 80.7% (73.2-86.9%) | 73.6% (69.6-77.4%) | 0.44 |
| CAD4TB | 0.283 | 80.0% (72.4-86.3%) | 73.4% (69.4-77.2%) | 0.26 |
| qXR | 0.622 | 79.3% (71.6-85.7%) | 73.6% (69.6-77.4%) | 0.16 |
| Chest Eye | 0.191 | 79.3% (71.6-85.7%) | 73.6% (69.6-77.4%) | 0.16 |
| **TiSepX-TB** | **0.305** | **76.7% (71.1-81.8%)** | **73.5% (69.5-77.3%)** | **0.01** |
| **XRayAME** | **0.242** | **71.4% (63.2-78.7%)** | **73.6% (69.6-77.4%)** | **6.64 x 10-6** |
| **RADIFY** | **0.581** | **43.0% (36.9-49.3%)** | **73.7% (69.7-77.4%)** | **< 2.2 x 10-16** |

## Annex 4. Performance of each country group of radiologists against different CAD

**CAD performance at the same sensitivities as each country of radiologists:**

**Restricted reading: Lunit vs human readers**

| **Screener** | **Sensitivity** | **Specificity** |
| --- | --- | --- |
| **UK radiologists** | 78.7%, (73.2-83.5%) | 76.7%, (72.9-80.3%) |
| **Lunit matched to UK radiologists** | 78.6% (70.8-85.1%) | 84.7% (81.3-87.7%) |
| **Nigerian radiologists** | 77.1%, (71.5-82.1%) | 75.8%, (71.8-79.4%) |
| **Lunit matched to Nigerian radiologists** | 77.1% (69.3-83.8%) | 85.1% (81.7-88.0%) |
| **US radiologists** | 68.6%, (62.6-74.2%) | 84.3%, (80.9-87.3%) |
| **Lunit matched to American radiologists** | 68.6% (60.2-76.1%) | 88.4% (85.3-91.0%) |
| **Indian radiologists** | 67.1%, (61.0-72.8%) | 83.3%, (79.8-86.5%) |
| **Lunit matched to Indian radiologists** | 67.1% (58.7-74.8%) | 89.1% (86.1-91.7%) |

**Inclusive reading: Lunit vs human readers**

| **Screener** | **Sensitivity** | **Specificity** |
| --- | --- | --- |
| **UK radiologists** | 87.2%, (82.5-91.0%) | 63.4%, (59.1-67.5%) |
| **Lunit matched to UK radiologists** | 87.1% (80.4-92.2%) | 79.5% (75.7-82.9%) |
| **Nigerian radiologists** | 86.8%, (82.1-90.7%) | 61.1%, (56.7-65.3%) |
| **Lunit matched to Nigerian radiologists** | 86.4% (79.6-91.6%) | 79.7% (75.9-83.0%) |
| **US radiologists** | 92.3%, (88.3-95.2%) | 47.3%, (42.9-51.7%) |
| **Lunit matched to American radiologists** | 92.1% (86.4-96.0%) | 68.4% (64.2-72.4%) |
| **Indian radiologists** | 82.6%, (77.4-87.0%) | 73.6%, (69.6-77.4%) |
| **Lunit matched to Indian radiologists** | 82.9% (75.6-88.7%) | 83.5% (80.0-86.6%) |

**Xvision performance at the same sensitivities as each region of radiologists:**

**Restricted reading: Xvision vs human readers**

| **Screener** | **Sensitivity** | **Specificity** |
| --- | --- | --- |
| **UK radiologists** | 78.7%, (73.2-83.5%) | 76.7%, (72.9-80.3%) |
| **Xvision matched to UK radiologists** | 78.7% (73.2-83.5%) | 79.5% (75.7-82.9%) |
| **Nigerian radiologists** | 77.1%, (71.5-82.1%) | 75.8%, (71.8-79.4%) |
| **Xvision matched to Nigerian radiologists** | 77.1% (71.5-82.1%) | 80.4% (76.7-83.8%) |
| **US radiologists** | 68.6%, (62.6-74.2%) | 84.3%, (80.9-87.3%) |
| **Xvision matched to American radiologists** | 68.6% (62.6-74.2%) | 88.6% (85.5-91.2%) |
| **Indian radiologists** | 67.1%, (61.0-72.8%) | 83.3%, (79.8-86.5%) |
| **Xvision matched to Indian radiologists** | 67.1% (61.0-72.8%) | 89.5% (86.6-92.0%) |

**Inclusive reading: Xvision vs human readers**

| **Screener** | **Sensitivity** | **Specificity** |
| --- | --- | --- |
| **UK radiologists** | 87.2%, (82.5-91.0%) | 63.4%, (59.1-67.5%) |
| **Xvision matched to UK radiologists** | 87.2% (82.5-91.0%) | 66.7% (62.4-70.7%) |
| **Nigerian radiologists** | 86.8%, (82.1-90.7%) | 61.1%, (56.7-65.3%) |
| **Xvision matched to Nigerian radiologists** | 86.8% (82.1-90.7%) | 67.8% (63.6-71.8%) |
| **US radiologists** | 92.3%, (88.3-95.2%) | 47.3%, (42.9-51.7%) |
| **Xvision matched to American radiologists** | 92.2% (88.3-95.2%) | 51.4% (46.9-55.7%) |
| **Indian radiologists** | 82.6%, (77.4-87.0%) | 73.6%, (69.6-77.4%) |
| **Xvision matched to Indian radiologists** | 82.6% (77.4-87.0%) | 75.2% (71.2-78.9%) |

**CAD4TB performance at the same sensitivities as each region of radiologists:**

**Restricted reading:**

| **Screener** | **Sensitivity** | **Specificity** |
| --- | --- | --- |
| **UK radiologists** | 78.7%, (73.2-83.5%) | 76.7%, (72.9-80.3%) |
| **CAD4TB matched to UK radiologists** | 78.6% (70.8-85.1%) | 77.1% (73.3-80.7%) |
| **Nigerian radiologists** | 77.1%, (71.5-82.1%) | 75.8%, (71.8-79.4%) |
| **CAD4TB matched to Nigerian radiologists** | 77.1% (69.3-83.8%) | 78.5% (74.7-82.0%) |
| **US radiologists** | 68.6%, (62.6-74.2%) | 84.3%, (80.9-87.3%) |
| **CAD4TB matched to American radiologists** | 68.6% (60.2-76.1%) | 84.3% (80.9-87.3%) |
| **Indian radiologists** | 67.1%, (61.0-72.8%) | 83.3%, (79.8-86.5%) |
| **CAD4TB matched to Indian radiologists** | 67.1% (58.7-74.8%) | 87.2% (84.0-90.0%) |

**Inclusive reading:**

| **Screener** | **Sensitivity** | **Specificity** |
| --- | --- | --- |
| **UK radiologists** | 87.2%, (82.5-91.0%) | 63.4%, (59.1-67.5%) |
| **CAD4TB matched to UK radiologists** | 87.1% (80.4-92.2%) | 60.5% (56.1-64.7%) |
| **Nigerian radiologists** | 86.8%, (82.1-90.7%) | 61.1%, (56.7-65.3%) |
| **CAD4TB matched to Nigerian radiologists** | 86.4% (79.6-91.6%) | 60.7% (56.3-64.9%) |
| **US radiologists** | 92.3%, (88.3-95.2%) | 47.3%, (42.9-51.7%) |
| **CAD4TB matched to American radiologists** | 92.1% (86.4-96.0%) | 51.2% (46.8-55.6%) |
| **Indian radiologists** | 82.6%, (77.4-87.0%) | 73.6%, (69.6-77.4%) |
| **CAD4TB matched to Indian radiologists** | 82.9% (75.6-88.7%) | 65.5% (61.2-69.6%) |

**Lunit performance at the same specificities as each region of radiologists:**

**Restricted reading:**

| **Screener** | **Sensitivity** | **Specificity** |
| --- | --- | --- |
| **UK radiologists** | 78.7%, (73.2-83.5%) | 76.7%, (72.9-80.3%) |
| **Lunit matched to UK radiologists** | 87.1% (80.4-92.2%) | 76.7% (72.9-80.3%) |
| **Nigerian radiologists** | 77.1%, (71.5-82.1%) | 75.8%, (71.8-79.4%) |
| **Lunit matched to Nigerian radiologists** | 88.6% (82.1-93.3%) | 75.8% (71.8-79.4%) |
| **US radiologists** | 68.6%, (62.6-74.2%) | 84.3%, (80.9-87.3%) |
| **Lunit matched to American radiologists** | 81.4% (74.0-87.5%) | 84.3% (80.9-87.3%) |
| **Indian radiologists** | 67.1%, (61.0-72.8%) | 83.3%, (79.8-86.5%) |
| **Lunit matched to Indian radiologists** | 82.9% (75.6-88.7%) | 83.3% (79.8-86.4%) |

**Inclusive reading:**

| **Screener** | **Sensitivity** | **Specificity** |
| --- | --- | --- |
| **UK radiologists** | 87.2%, (82.5-91.0%) | 63.4%, (59.1-67.5%) |
| **Lunit matched to UK radiologists** | 92.1% (86.4-96.0%) | 63.4% (59.1-67.5%) |
| **Nigerian radiologists** | 86.8%, (82.1-90.7%) | 61.1%, (56.7-65.3%) |
| **Lunit matched to Nigerian radiologists** | 93.6% (88.1-97.0%) | 61.0% (56.7-65.3%) |
| **US radiologists** | 92.3%, (88.3-95.2%) | 47.3%, (42.9-51.7%) |
| **Lunit matched to American radiologists** | 96.4% (91.9-98.8%) | 47.3% (42.9-51.7%) |
| **Indian radiologists** | 82.6%, (77.4-87.0%) | 73.6%, (69.6-77.4%) |
| **Lunit matched to Indian radiologists** | 89.3% (82.9-93.9%) | 73.6% (69.6-77.4%) |

**Xvision performance at the same specificities as each region of radiologists:**

**Restricted reading:**

| **Screener** | **Sensitivity** | **Specificity** |
| --- | --- | --- |
| **UK radiologists** | 78.7%, (73.2-83.5%) | 76.7%, (72.9-80.3%) |
| **Xvision matched to UK radiologists** | 81.0% (75.7-85.6%) | 76.7% (72.9-80.3%) |
| **Nigerian radiologists** | 77.1%, (71.5-82.1%) | 75.8%, (71.8-79.4%) |
| **Xvision matched to Nigerian radiologists** | 81.8% (76.5-86.3%) | 75.8% (71.8-79.4%) |
| **US radiologists** | 68.6%, (62.6-74.2%) | 84.3%, (80.9-87.3%) |
| **Xvision matched to American radiologists** | 72.5% (66.6-77.8%) | 84.3% (80.9-87.3%) |
| **Indian radiologists** | 67.1%, (61.0-72.8%) | 83.3%, (79.8-86.5%) |
| **Xvision matched to Indian radiologists** | 74.0% (68.2-79.3%) | 83.3% (79.8-86.4%) |

**Inclusive reading:**

| **Screener** | **Sensitivity** | **Specificity** |
| --- | --- | --- |
| **UK radiologists** | 87.2%, (82.5-91.0%) | 63.4%, (59.1-67.5%) |
| **Xvision matched to UK radiologists** | 88.4% (83.8-92.0%) | 63.2% (58.9-67.4%) |
| **Nigerian radiologists** | 86.8%, (82.1-90.7%) | 61.1%, (56.7-65.3%) |
| **Xvision matched to Nigerian radiologists** | 89.1% (84.7-92.7%) | 60.9% (56.5-65.1%) |
| **US radiologists** | 92.3%, (88.3-95.2%) | 47.3%, (42.9-51.7%) |
| **Xvision matched to American radiologists** | 93.4% (89.7-96.1%) | 47.9% (43.5-52.3%) |
| **Indian radiologists** | 82.6%, (77.4-87.0%) | 73.6%, (69.6-77.4%) |
| **Xvision matched to Indian radiologists** | 82.9% (77.8-87.3%) | 73.6% (69.6-77.4%) |

**CAD4TB performance at the same specificities as each region of radiologists:**

**Restricted reading:**

| **Screener** | **Sensitivity** | **Specificity** |
| --- | --- | --- |
| **UK radiologists** | 78.7%, (73.2-83.5%) | 76.7%, (72.9-80.3%) |
| **CAD4TB matched to UK radiologists** | 78.6% (70.8-85.1%) | 76.7% (72.9-80.3%) |
| **Nigerian radiologists** | 77.1%, (71.5-82.1%) | 75.8%, (71.8-79.4%) |
| **CAD4TB matched to Nigerian radiologists** | 78.6% (70.8-85.1%) | 75.8% (71.8-79.4%) |
| **US radiologists** | 68.6%, (62.6-74.2%) | 84.3%, (80.9-87.3%) |
| **CAD4TB matched to American radiologists** | 69.3% (60.9-76.8%) | 84.3% (80.9-87.3%) |
| **Indian radiologists** | 67.1%, (61.0-72.8%) | 83.3%, (79.8-86.5%) |
| **CAD4TB matched to Indian radiologists** | 70.0% (61.7-77.4%) | 83.3% (79.8-86.4%) |

**Inclusive reading:**

| **Screener** | **Sensitivity** | **Specificity** |
| --- | --- | --- |
| **UK radiologists** | 87.2%, (82.5-91.0%) | 63.4%, (59.1-67.5%) |
| **CAD4TB matched to UK radiologists** | 84.3% (77.2-89.9%) | 63.2% (58.9-67.4%) |
| **Nigerian radiologists** | 86.8%, (82.1-90.7%) | 61.1%, (56.7-65.3%) |
| **CAD4TB matched to Nigerian radiologists** | 85.0% (78.0-90.5%) | 61.0% (56.7-65.3%) |
| **US radiologists** | 92.3%, (88.3-95.2%) | 47.3%, (42.9-51.7%) |
| **CAD4TB matched to American radiologists** | 92.9% (87.3-96.5%) | 47.1% (42.7-51.5%) |
| **Indian radiologists** | 82.6%, (77.4-87.0%) | 73.6%, (69.6-77.4%) |
| **CAD4TB matched to Indian radiologists** | 80.0% (72.4-86.3%) | 73.4% (69.4-77.2%) |

## Annex 5: Euclidean analysis comparing individual radiologists against best-performing CAD

*Table: P-values for differences in Euclidean distance (Restricted)*

|  | UK 2 | UK 3 | UK 4 | US 1 | US 2 | India 1 | India 2 | India 3 | Nigeria 1 | Nigeria 2 |
| --- | --- | --- | --- | --- | --- | --- | --- | --- | --- | --- |
| UK 1 | **0.036** | 0.127 | 0.294 | 0.599 | **0.015** | 0.059 | 0.761 | 0.693 | 0.718 | 0.406 |
| UK 2 |  | 0.814 | 0.546 | 0.237 | 0.842 | 0.908 | 0.164 | 0.205 | 0.186 | 0.46 |
| UK 3 |  |  | 0.804 | 0.413 | 0.657 | 0.875 | 0.328 | 0.382 | 0.35 | 0.618 |
| UK 4 |  |  |  | 0.563 | 0.437 | 0.674 | 0.474 | 0.523 | 0.486 | 0.857 |
| US 1 |  |  |  |  | 0.147 | 0.309 | 0.892 | 0.961 | 0.925 | 0.743 |
| US 2 |  |  |  |  |  | 0.78 | 0.074 | 0.114 | 0.098 | 0.361 |
| India 1 |  |  |  |  |  |  | 0.217 | 0.276 | 0.259 | 0.508 |
| India 2 |  |  |  |  |  |  |  | 0.942 | 1 | 0.576 |
| India 3 |  |  |  |  |  |  |  |  | 0.982 | 0.703 |
| Nigeria 1 |  |  |  |  |  |  |  |  |  | 0.634 |

**Bold indicates significant difference in euclidean distance (p-value < 0.05)**

*Table: P-values for differences in Euclidean distance (Inclusive)*

|  | UK 2 | UK 3 | UK 4 | US 1 | US 2 | India 1 | India 2 | India 3 | Nigeria 1 | Nigeria 2 |
| --- | --- | --- | --- | --- | --- | --- | --- | --- | --- | --- |
| UK 1 | 0.0926 | 0.8779 | 0.9426 | 0.6538 | 0.2533 | 0.448 | 0.2753 | 0.6381 | 0.883 | **0.018** |
| UK 2 |  | 0.157 | 0.116 | 0.201 | 0.586 | 0.329 | 0.575 | 0.208 | 0.129 | 0.838 |
| UK 3 |  |  | 0.909 | 0.85 | 0.382 | 0.614 | 0.403 | 0.806 | 0.981 | 0.068 |
| UK 4 |  |  |  | 0.745 | 0.295 | 0.514 | 0.312 | 0.676 | 0.924 | **0.035** |
| US 1 |  |  |  |  | 0.478 | 0.734 | 0.496 | 0.963 | 0.821 | 0.146 |
| US 2 |  |  |  |  |  | 0.691 | 1 | 0.523 | 0.349 | 0.43 |
| India 1 |  |  |  |  |  |  | 0.711 | 0.767 | 0.599 | 0.249 |
| India 2 |  |  |  |  |  |  |  | 0.542 | 0.362 | 0.423 |
| India 3 |  |  |  |  |  |  |  |  | 0.783 | 0.183 |
| Nigeria 1 |  |  |  |  |  |  |  |  |  | 0.058 |

**Bold indicates significant difference in Euclidean distance (p-value < 0.05)**

## Annex 6. Number of radiologists, years of experience, TB CXR read per year and for this study.

| **Country** | **Radiologist** | **Years of experience** | **Number of TB CXR read per year** | **Number of CXR read for this study** |
| --- | --- | --- | --- | --- |
| UK | 1 | 14 | 500+ | 407 |
| 2 | 27 | 500+ | 168 |
| 3 | 7 | 500+ | 117 |
| 4 | 18 | 500+ | 82 |
| India | 1 | 7 | 5,000-6,000 | 236 |
| 2 | 10 | 7,000-8,000 | 104 |
| 3 | 12 | 9,000-10,000 | 434 |
| Nigeria | 1 | 12 | 5,000 | 428 |
| 2 | 10 | 5,000 | 346 |
| US | 1 | 18 | 700+ | 724 |
| 2 | 25 | 50+ | 50 |
